# Supplementary material
Source: publisher figshare collection journal article supplement (https://acs.figshare.com/ndownloader/files/17412689)
Supplement: Supplementary file 1 [file 17412689]

## Supporting information

### ***p*-Type Conductivity of Hydrated Amorphous V<sub>2</sub>O<sub>5</sub> and its Enhanced Photocatalytic Performance in ZnO/V<sub>2</sub>O<sub>5</sub>/rGO**

Heechae Choi,<sup>1,‡</sup> Yong Jung Kwon,<sup>2,‡</sup> Juwon Paik,<sup>2</sup> Jae-Bok Seol<sup>3</sup> and Young Kyu Jeong<sup>2,\*</sup>

<sup>1</sup>Theoretical Materials & Chemistry Group, Institute of Inorganic Chemistry, University of Cologne, Greinstr. 6, 50939, Cologne, Germany

<sup>2</sup>Non-Ferrous Materials Group, KITECH, Gangneung 25440, South Korea

<sup>3</sup>National Institute for Nanomaterials Technology, POSTECH, Pohang 37673, South Korea

\*Corresponding author. E-mail address: immrc8o@gmail.com (Y. K. Jeong)

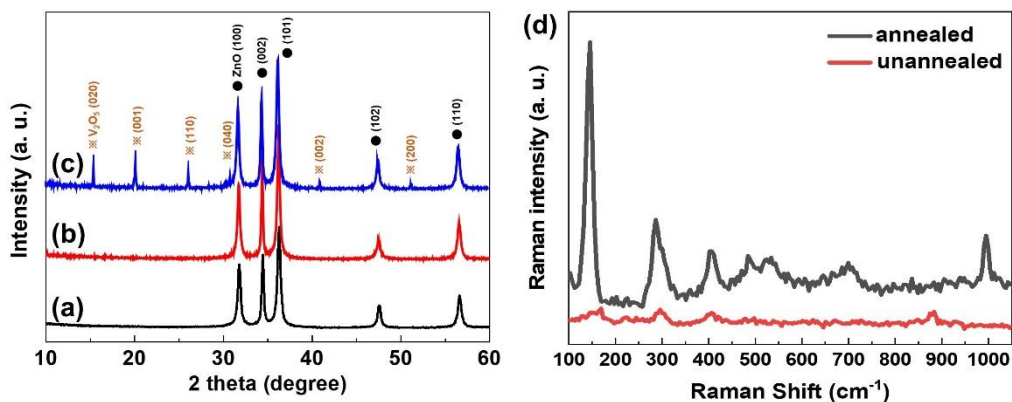

**Figure S1.** XRD patterns of (a) FLZ, (b) FLZ/*ha*-V<sub>2</sub>O<sub>5</sub> and (c) FLZ/*c*-V<sub>2</sub>O<sub>5</sub>. (d) Raman spectra of annealed FLZ/*c*-V<sub>2</sub>O<sub>5</sub> and unannealed FLZ/*ha*-V<sub>2</sub>O<sub>5</sub> structures, respectively.

Figure S1(a) shows an XRD pattern of FLZ, exhibiting reflection peaks that can be indexed to the ZnO phase (JCPDS card: No. 36-1451). Also, the XRD spectra of FLZ/*ha*-V<sub>2</sub>O<sub>5</sub> in Figure S2(b) show only the peaks of the ZnO phase without the peak associated with V<sub>2</sub>O<sub>5</sub> phase. This result demonstrates that the unannealed *ha*-V<sub>2</sub>O<sub>5</sub> shell layer is apparently amorphous. On the other hand, in figure S1(c), the XRD spectra of the FLZ/*c*-V<sub>2</sub>O<sub>5</sub> exhibits ZnO-related peaks and also shows the reflections of V<sub>2</sub>O<sub>5</sub> phase with a lattice parameter of  $a = 1.1516$  nm,  $b = 0.35656$  nm, and  $c = 0.4372$  nm (JCPDS: 41-1426), indicating that the *ha*-V<sub>2</sub>O<sub>5</sub> shell layers was crystallized by thermal annealing process.

Figure S1(d) shows a Raman spectra of annealed FLZ/*c*-V<sub>2</sub>O<sub>5</sub> and unannealed FLZ/*ha*-V<sub>2</sub>O<sub>5</sub> structures, respectively. Annealed V<sub>2</sub>O<sub>5</sub> exhibits sharp bands reflecting its ordered crystal structure. The sharp Raman band at  $995\text{ cm}^{-1}$  stems from vibration of the V=O double bond and the remaining bands from  $200\text{--}800\text{ cm}^{-1}$  correspond to various vibrations of bridging V–O–V bonds of crystalline V<sub>2</sub>O<sub>5</sub>. In contrast to the sharp characteristics of Raman bands in the annealed V<sub>2</sub>O<sub>5</sub>, the unannealed one doesn't show the bands of crystalline V<sub>2</sub>O<sub>5</sub> and possess broad bands implying the absence of long-range order.

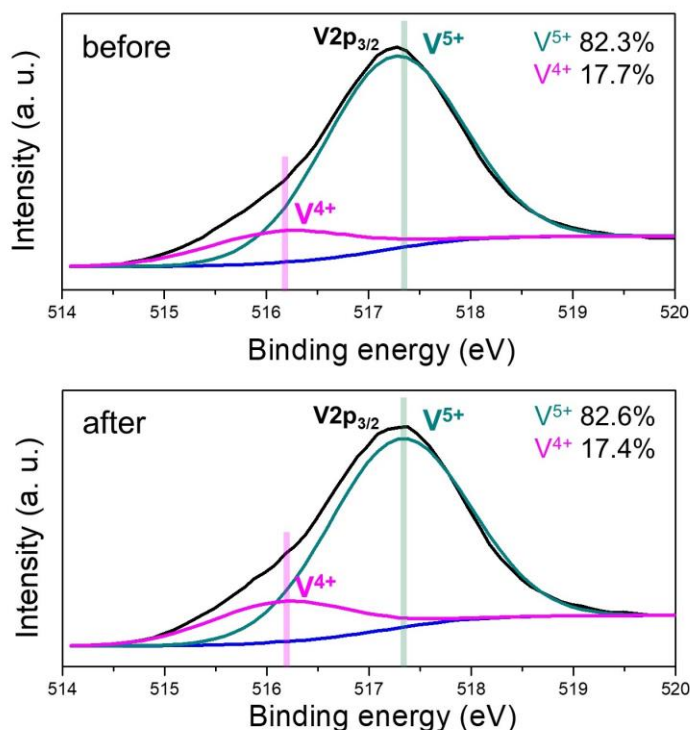

**Figure S2.** XPS V2p spectra of V<sub>2</sub>O<sub>5</sub> before (top) and after (bottom) the RhB degradation test.

In order to confirm any compositional changes or contaminations of *ha*-V<sub>2</sub>O<sub>5</sub> in the FLZ/*ha*-V<sub>2</sub>O<sub>5</sub>/rGO system during the photocatalytic experiments, we have performed XPS analysis. Figure S2 shows the V 2p spectra of V<sub>2</sub>O<sub>5</sub> before and after the RhB degradation test. The XPS spectra show two peaks that correspond to V<sup>4+</sup> and V<sup>5+</sup>, respectively, indicating V<sub>2</sub>O<sub>5</sub> dominantly consist of V<sub>2</sub>O<sub>5</sub> compound with a small portion of VO<sub>2</sub>. In addition, the two peaks were found to be almost identical suggesting that there are no significant changes in the chemical state and composition of V<sub>2</sub>O<sub>5</sub>. These XPS results additionally support the enhanced chemical stability of V<sub>2</sub>O<sub>5</sub> by applying the rGO matrix in the FLZ/*ha*-V<sub>2</sub>O<sub>5</sub>/rGO system.

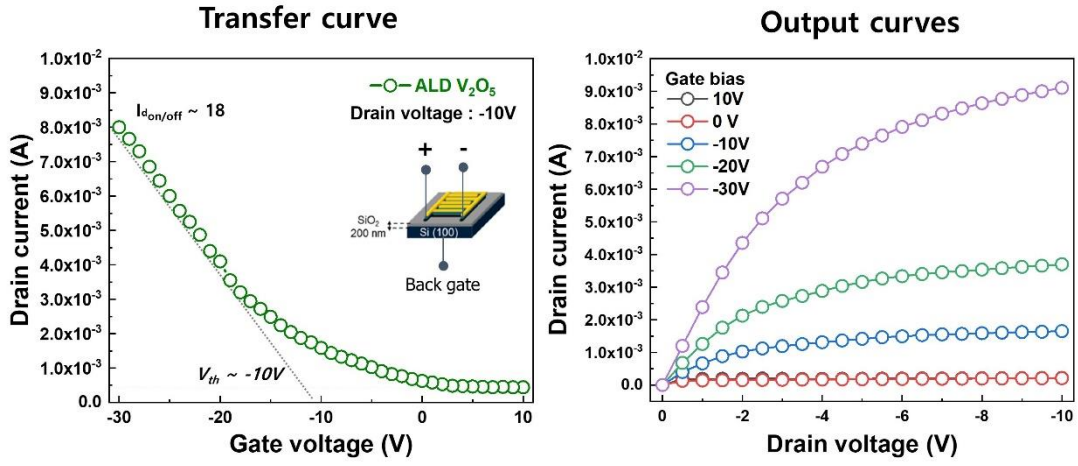

**Figure S3.** Electric characterizations of p-type ALD V<sub>2</sub>O<sub>5</sub> layer which shows p-type behaviors in transfer & output curves at room temperature.

We investigated its electric transport properties by fabricating a field-effect transistor (FET) which uses *ha*-V<sub>2</sub>O<sub>5</sub> as a channel layer with back gate structures in order to study the conducting behavior of *ha*-V<sub>2</sub>O<sub>5</sub> at room temperature. This device has a channel length of 10  $\mu\text{m}$  and a dielectric (SiO<sub>2</sub>) thickness of 200 nm. As shown in the transfer and output curves, the transfer and output curves of the *ha*-V<sub>2</sub>O<sub>5</sub> FET clearly show typical p-type characteristics at room temperature.
